# Supplementary material for: Effects of structures of HgX2 complexes (X = CF3SO3 and Cl) with chiral bidentate ligands on circular dichroism spectra
Source: Royal Society of Chemistry journal article supplement (doi:10.1039/c2dt32712k), 2012-12-04
Supplement: c2dt32712k.pdf [file c2dt32712k.pdf]

Supplementary Information for

Effects of Structures of HgX<sub>2</sub> Complexes (X = CF<sub>3</sub>SO<sub>3</sub> and Cl)  
with Chiral Bidentate Ligands on Circular Dichroism Spectra

*Mari Ikeda,<sup>†‡</sup> Shunsuke Kuwahara,<sup>†‡</sup> Shim Sung Lee,<sup>§</sup> and*

*Yoichi Habata<sup>\*†‡</sup>*

*<sup>†</sup>Department of Chemistry, Faculty of Science,*

*<sup>‡</sup>Research Center for Materials with Integrated Properties,*

*Toho University*

*2-2-1 Miyama, Funabashi, Chiba 274-8510, Japan*

*<sup>§</sup>Department of Chemistry and Research Institute of Natural Science,*

*Gyeongsang National University,*

*Jinju 660-701, S. Korea*

## *Table of Contents*

|                         |                                                                                                               |   |
|-------------------------|---------------------------------------------------------------------------------------------------------------|---|
| <b>Figure S1 and S2</b> | Hg(CF <sub>3</sub> SO <sub>3</sub> ) <sub>2</sub> -induced cold ESI-MS changes of ( <i>R</i> )-(-)- <b>1a</b> | 3 |
| <b>Figure S3 and S4</b> | Hg(CF <sub>3</sub> SO <sub>3</sub> ) <sub>2</sub> -induced cold ESI-MS changes of ( <i>R</i> )-(+)- <b>1b</b> | 4 |
| <b>Figure S5 and S6</b> | Hg(CF <sub>3</sub> SO <sub>3</sub> ) <sub>2</sub> -induced cold ESI-MS changes of ( <i>R</i> )-(-)- <b>2a</b> | 5 |
| <b>Figure S7 and S8</b> | Hg(CF <sub>3</sub> SO <sub>3</sub> ) <sub>2</sub> -induced cold ESI-MS changes of ( <i>R</i> )-(+)- <b>2b</b> | 6 |

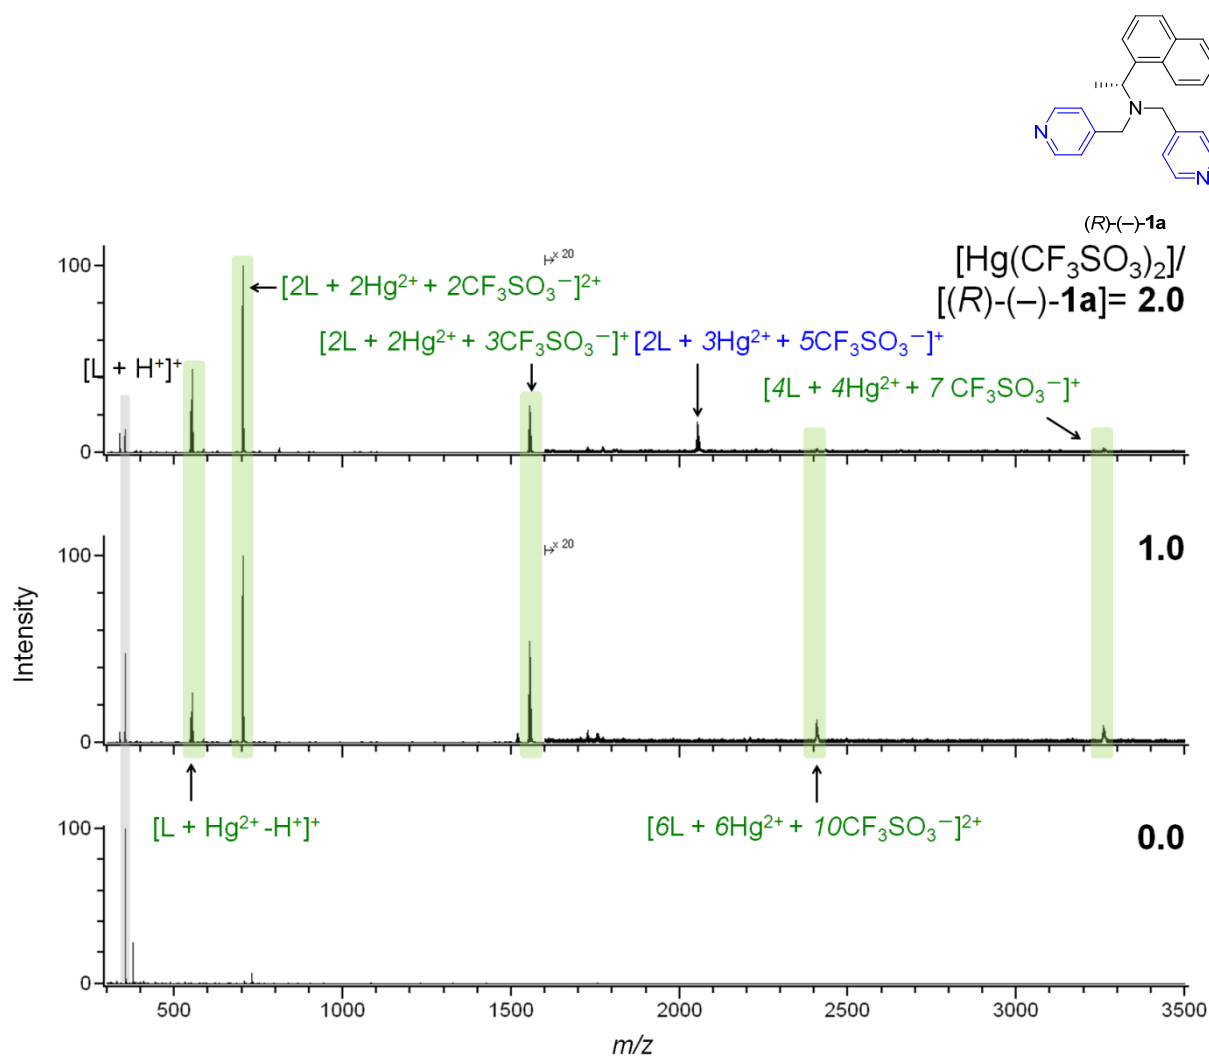

**Figure S1.**  $\text{Hg}(\text{CF}_3\text{SO}_3)_2$ -induced cold ESI mass spectral changes of  $(R)-(-)-\mathbf{1a}$  in  $\text{CH}_3\text{OH}$  at 298 K. ( $[(R)-(-)-\mathbf{1a}] = 2.5 \times 10^{-7} \text{ M}$ ). L means  $(R)-(-)-\mathbf{1a}$ .

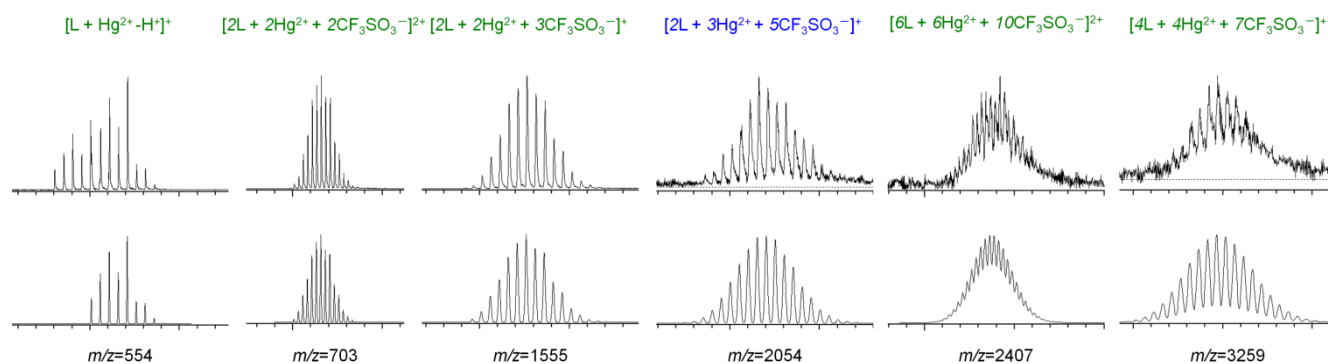

**Figure S2** Observed ion peaks (top) and theoretical distributions (bottom).

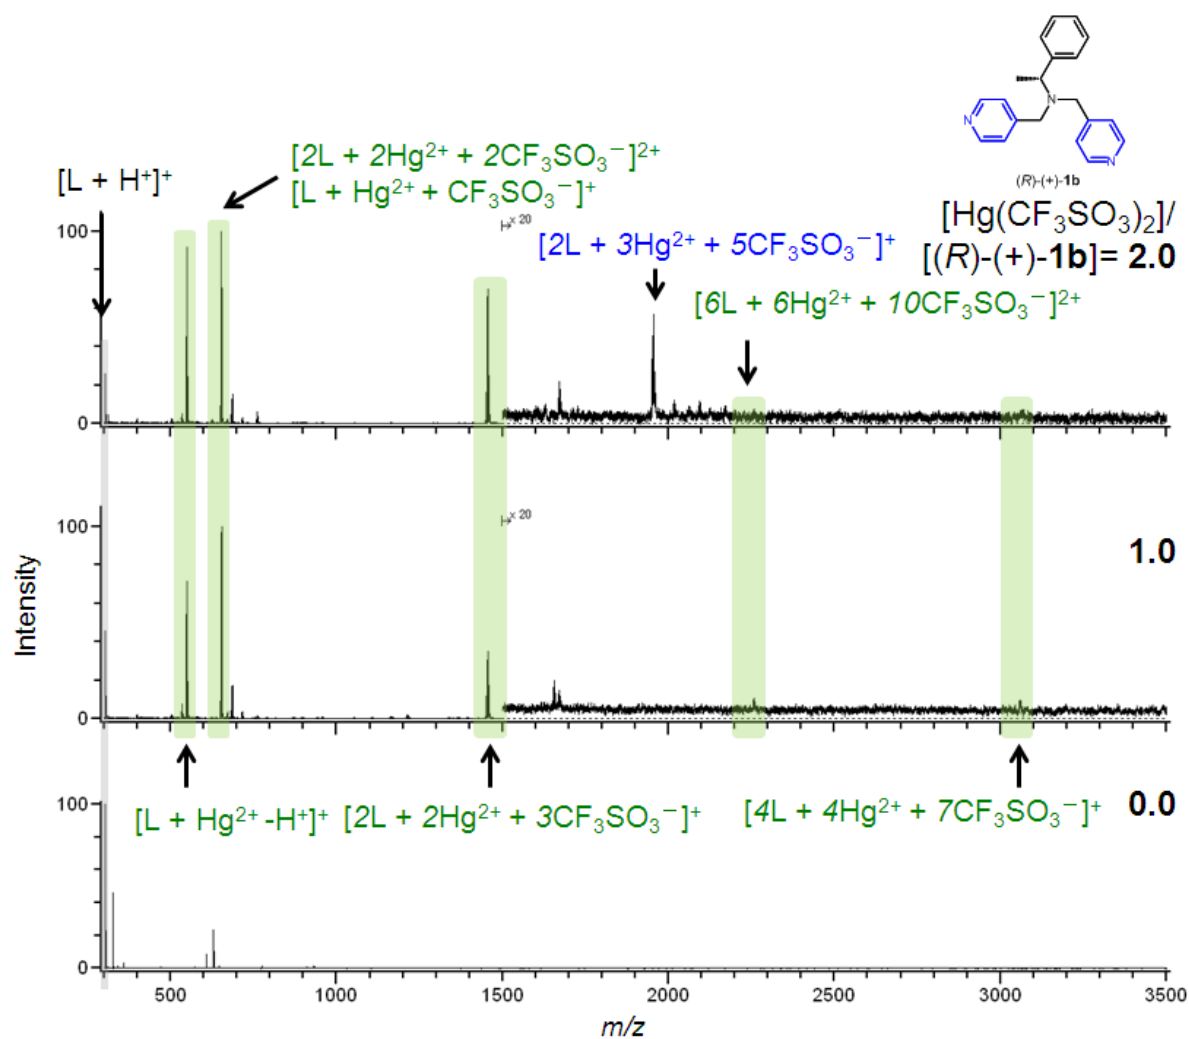

**Figure S3.**  $Hg(CF_3SO_3)_2$ -induced cold ESI mass spectral changes of  $(R)-(+)-1b$  in  $CH_3OH$  at 298 K. ( $[ (R)-(+)-1b ] = 2.5 \times 10^{-7} M$ ). L means  $(R)-(+)-1b$ .

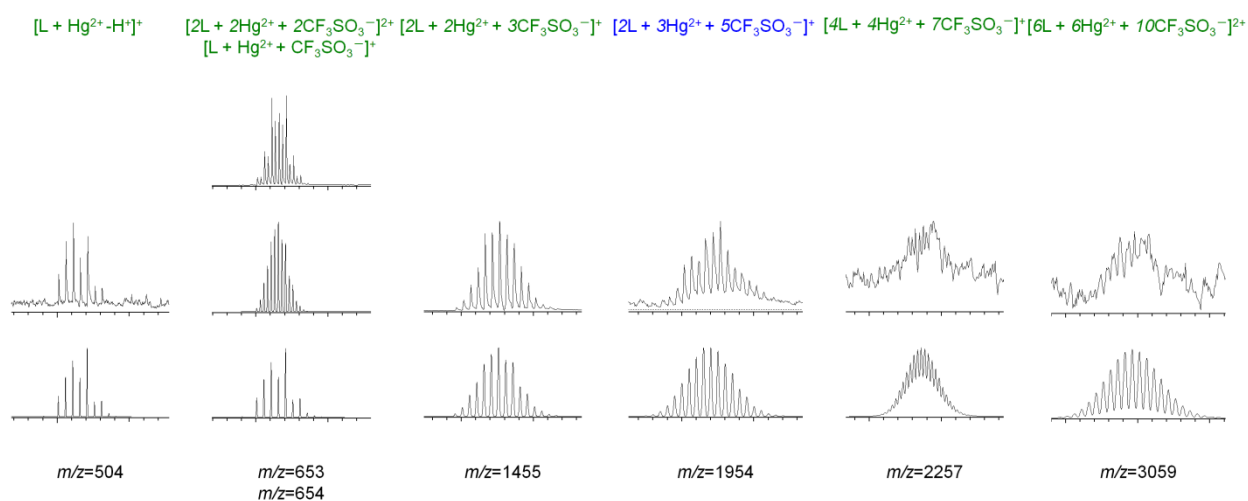

**Figure S4.** Observed ion peaks (top) and theoretical distributions (bottom).

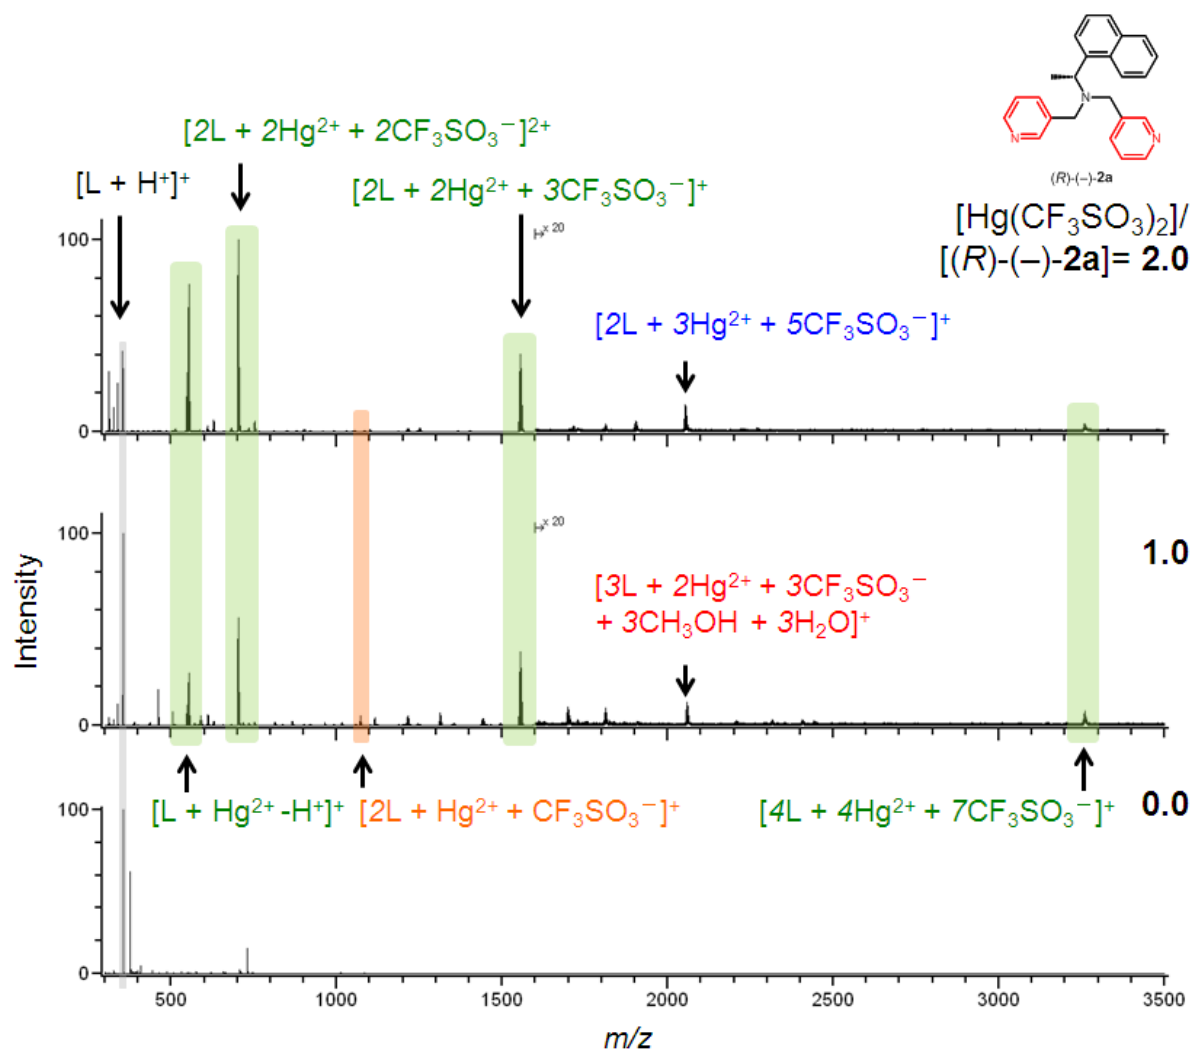

**Figure S5.**  $Hg(CF_3SO_3)_2$ -induced cold ESI mass spectral changes of  $(R)-(-)-2a$  in  $CH_3OH$  at 298 K. ( $[(R)-(-)-2a] = 2.5 \times 10^{-7}$  M). L means  $(R)-(-)-2a$ .

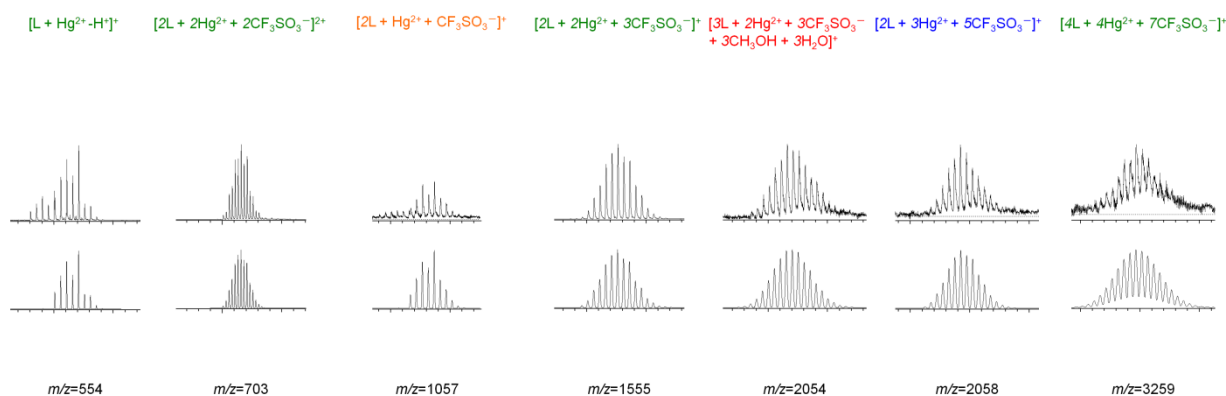

**Figure S6.** Observed ion peaks (top) and theoretical distributions (bottom).

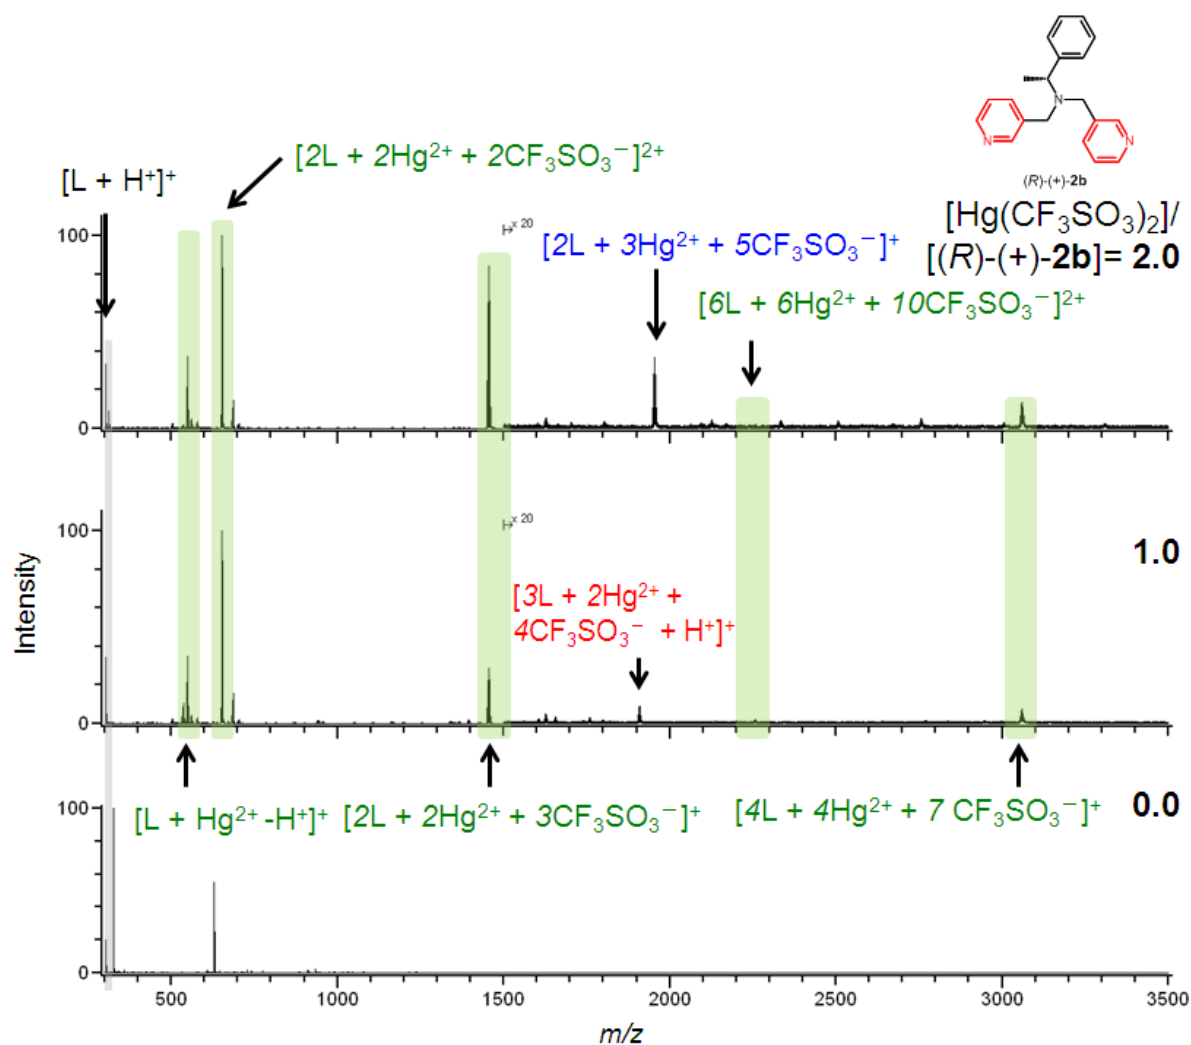

**Figure S7.**  $\text{Hg}(\text{CF}_3\text{SO}_3)_2$ -induced cold ESI mass spectral changes of (R)-(+)-2b in  $\text{CH}_3\text{OH}$  at 298 K. ( $[(R)-(+)-2b] = 2.5 \times 10^{-7} \text{ M}$ ). L means (R)-(+)-2b.

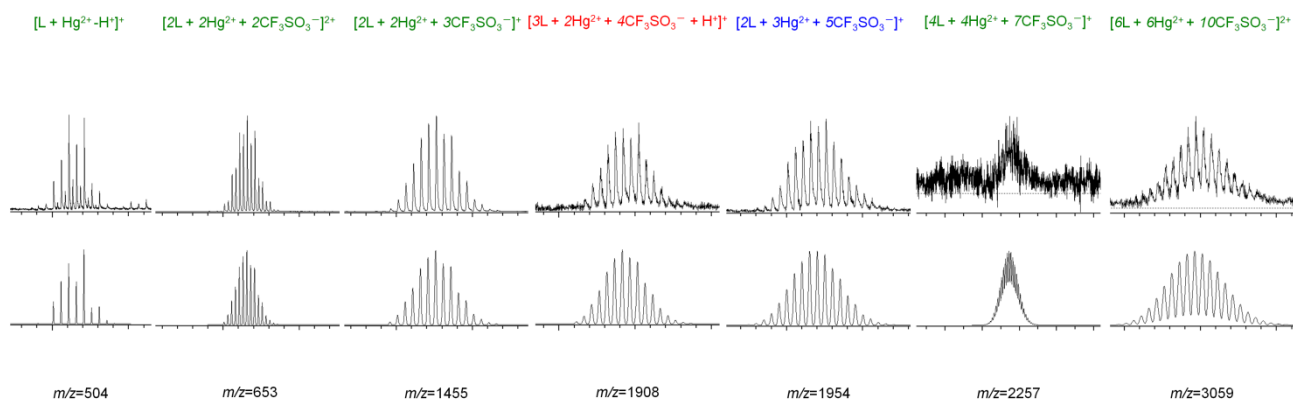

**Figure S8.** Observed ion peaks (top) and theoretical distributions (bottom).
